# Supplementary material
Source: MDPI journal article supplement (https://www.mdpi.com/2071-1050/15/17/12992)
Supplement: s1 [file s1]

## SUPPLEMENTARY MATERIALS

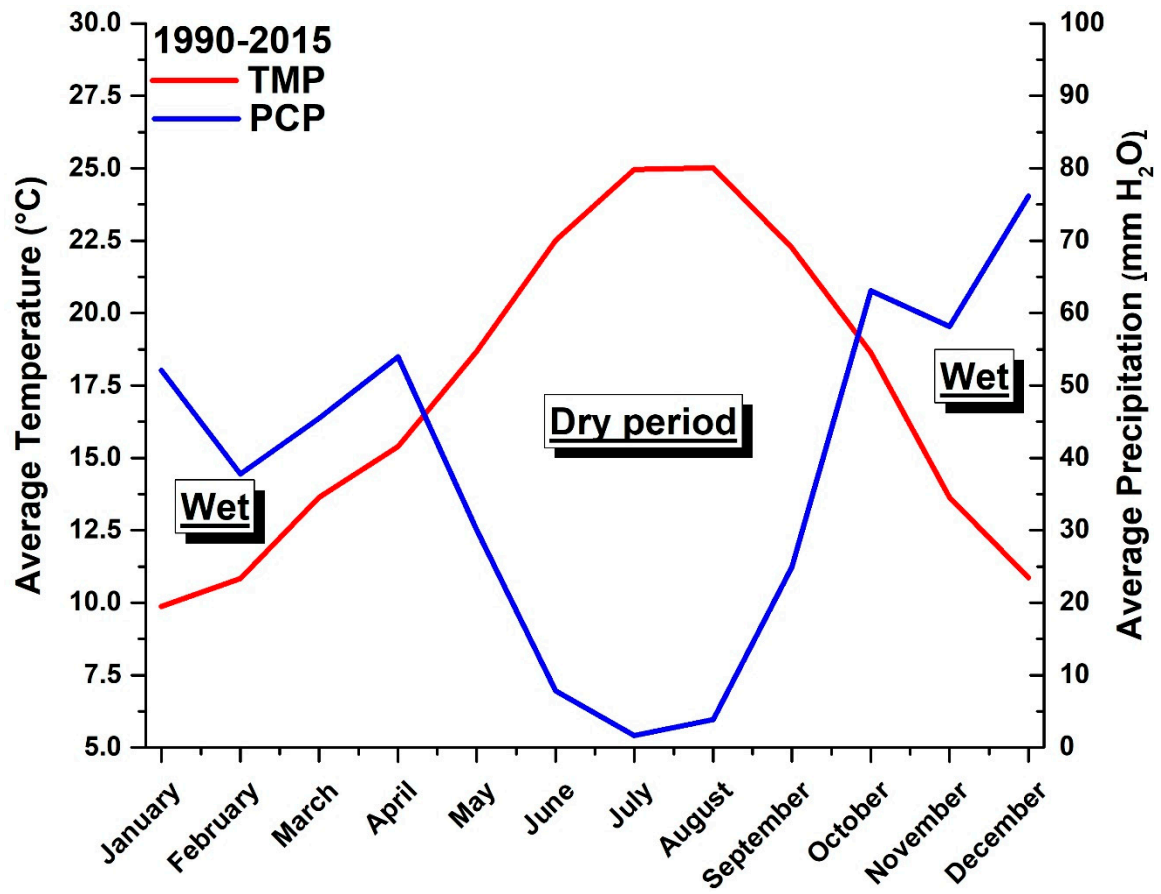

Figure S1: Thermo-pluviometric diagram for the Alentejo region.

**Table S1:** Morphology-slope and land cover classification (CLC, 2018) for the four study sites.

| <b><u>Morphology-Slope</u></b>            |                     |           |           |           |           |
|-------------------------------------------|---------------------|-----------|-----------|-----------|-----------|
| <b>CLASSIFICATION (%)</b>                 |                     | <b>P1</b> | <b>P2</b> | <b>P3</b> | <b>P4</b> |
| <b>0-5</b>                                | Flat-Gently sloping | 7%        | 55%       | 17%       | 77%       |
| <b>5-10</b>                               | Moderately sloping  | 10%       | 25%       | 16%       | 21%       |
| <b>10-15</b>                              | Strongly sloping    | 14%       | 15%       | 20%       | 2%        |
| <b>15-20</b>                              | Moderately steep    | 23%       | 5%        | 19%       | 0%        |
| <b>&gt;20</b>                             | Steep               | 46%       | 0%        | 28%       | -         |
| <b><u>Land Cover (CLC-Categories)</u></b> |                     |           |           |           |           |
| <b>CLASSIFICATION</b>                     |                     | <b>P1</b> | <b>P2</b> | <b>P3</b> | <b>P4</b> |
| <b>FRSE</b>                               |                     | 96%       | 62%       | 36%       | 7%        |
| <b>OLIV</b>                               |                     | -         | 19%       | -         | 3%        |
| <b>OATS</b>                               |                     | -         | 11%       | -         | 1%        |
| <b>WPAS</b>                               |                     | 4%        | 8%        | 64%       | 89%       |

**Table S2:** SWAT soil parameters for the identified soil groups.

| <b>SOIL TYPE</b>         | <b>SWAT main parameters</b>       |                    |                                   |                   |                     |                     |                     |                     |
|--------------------------|-----------------------------------|--------------------|-----------------------------------|-------------------|---------------------|---------------------|---------------------|---------------------|
|                          | <b>BD<br/>(g*cm<sup>-3</sup>)</b> | <b>AWC<br/>(%)</b> | <b>Ks<br/>(mm*h<sup>-1</sup>)</b> | <b>OC<br/>(%)</b> | <b>Clay<br/>(%)</b> | <b>Silt<br/>(%)</b> | <b>Sand<br/>(%)</b> | <b>Rock<br/>(%)</b> |
| <b>Eutric Cambisols</b>  | 1.52                              | 0.14               | 33.46                             | 0.85              | 10                  | 25                  | 65                  | 11                  |
| <b>Leptosols</b>         | 1.50                              | 0.18               | 28.71                             | 0.70              | 10                  | 25                  | 66                  | 23                  |
| <b>Gleyic Luvisols</b>   | 1.20                              | 0.17               | 17.98                             | 1.55              | 17                  | 33                  | 50                  | 10                  |
| <b>Haplic Luvisols</b>   | 1.37                              | 0.15               | 21.20                             | 1.03              | 10                  | 30                  | 55                  | 5                   |
| <b>Chromic Vertisols</b> | 1.07                              | 0.15               | 26.27                             | 0.82              | 38                  | 32                  | 30                  | 0                   |
| <b>Pellic Vertisols</b>  | 1.06                              | 0.20               | 7.74                              | 0.67              | 45                  | 30                  | 25                  | 0                   |

## LIST OF ABBREVIATION

AET = actual evapotranspiration  
ALPHA\_BF = Baseflow alpha factor  
AR5 = Fifth Assessment Report  
AWC = available water content  
BD = bulk density  
BAU = business as usual, BAU  
CC= climate change  
CLC = Corine Land Cover  
DEEP\_IMP = Distance to the impervious layer  
DGADR = Direcção-Geral de Agricultura e Desenvolvimento Rural  
DEM = Digital Elevation Model  
EPCO = plant uptake compensation  
ESCO = soil evaporation factor  
FRSE = rainfed forest  
GCM = Global Climate Model  
GHG = greenhouse gas  
GW\_DELAY = Groundwater delay time  
GW\_REVAP = groundwater "revap" coefficient  
HIST = EURO-CORDEX historical  
HRU = Hydrological Response Unit  
IPCC = Intergovernmental Panel on Climate Change  
Ks = hydraulic conductivity  
LISEM = Limburg Soil Erosion Model  
MUSLE = Modified Universal Soil Loss Equation  
NSE = Nash-Sutcliffe efficiency  
OATS = rainfed crop  
OLIV = olive plantations  
PBIAS = percent of bias  
PET = potential evapotranspiration  
PINE = coniferous and mixed forest

RCHGR\_DP = deep aquifer percolation fraction

RCMs = Regional Climate Models

RCP4.5 = Representative Concentration Pathways 4.5

RCP8.5 = Representative Concentration Pathways 8.5

REVAP\_MN = Threshold depth of water in the shallow aquifer for "revap" or percolation to the deep aquifer to occur (mm H<sub>2</sub>O)

RUSLE = revised Universal Soil Loss Equation

SE= Soil erosion

SLM= sustainable land management

SLSUBBSN = Average slope length

SOC = soil organic carbon

SRTM = Shuttle Radar Topography Mission

SUFI-2 = Sequential Uncertainty Fitting version 2

SWAT = Soil and Water Assessment Tool

URMD = artificial settlements

UROSEM = European Soil Erosion Model

USLE\_C = erosion lad cover factor

USLE = Universal Soil Loss Equation

USLE\_K = USLE equation soil erodibility

WEPP = Water Erosion Prediction Model

WPAS = Winter Pasture here intended as “montado” system
